# Supplementary material for: The mechanism of NDM-1-catalyzed carbapenem hydrolysis is distinct from that of penicillin or cephalosporin hydrolysis
Source: PubMed Central journal article supplement (PMC5740130; doi:10.1038/s41467-017-02339-w), 2017-12-21
Supplement: 41467_2017_2339_MOESM1_ESM.pdf [file 41467_2017_2339_MOESM1_ESM.pdf]

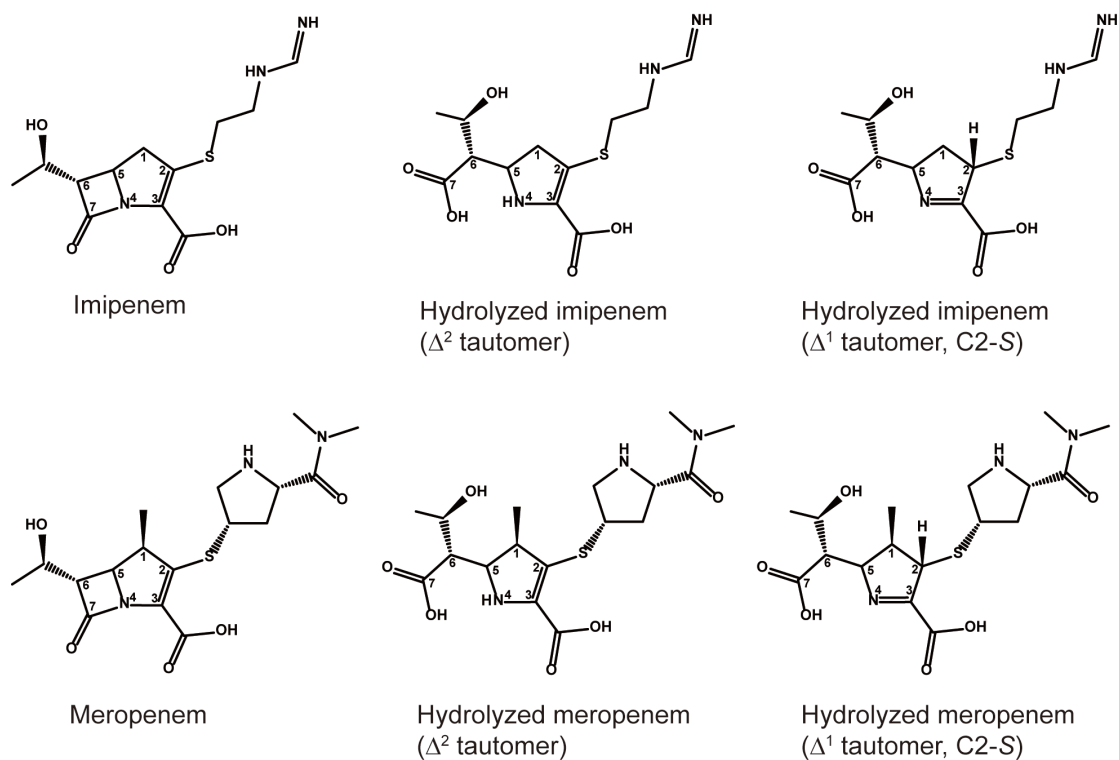

**Supplementary Figure 1.** Chemical structures of imipenem and meropenem that were used as  $\beta$ -lactam antibiotic substrates in this study. The  $\Delta^2$  tautomer of hydrolyzed antibiotic molecules was modeled in the crystal structures representing the EI<sub>1</sub> intermediates, while the  $\Delta^1$  tautomer (*S* chirality at position 2) was modeled in the structures representing the EI<sub>2</sub> intermediates and the EP complex.

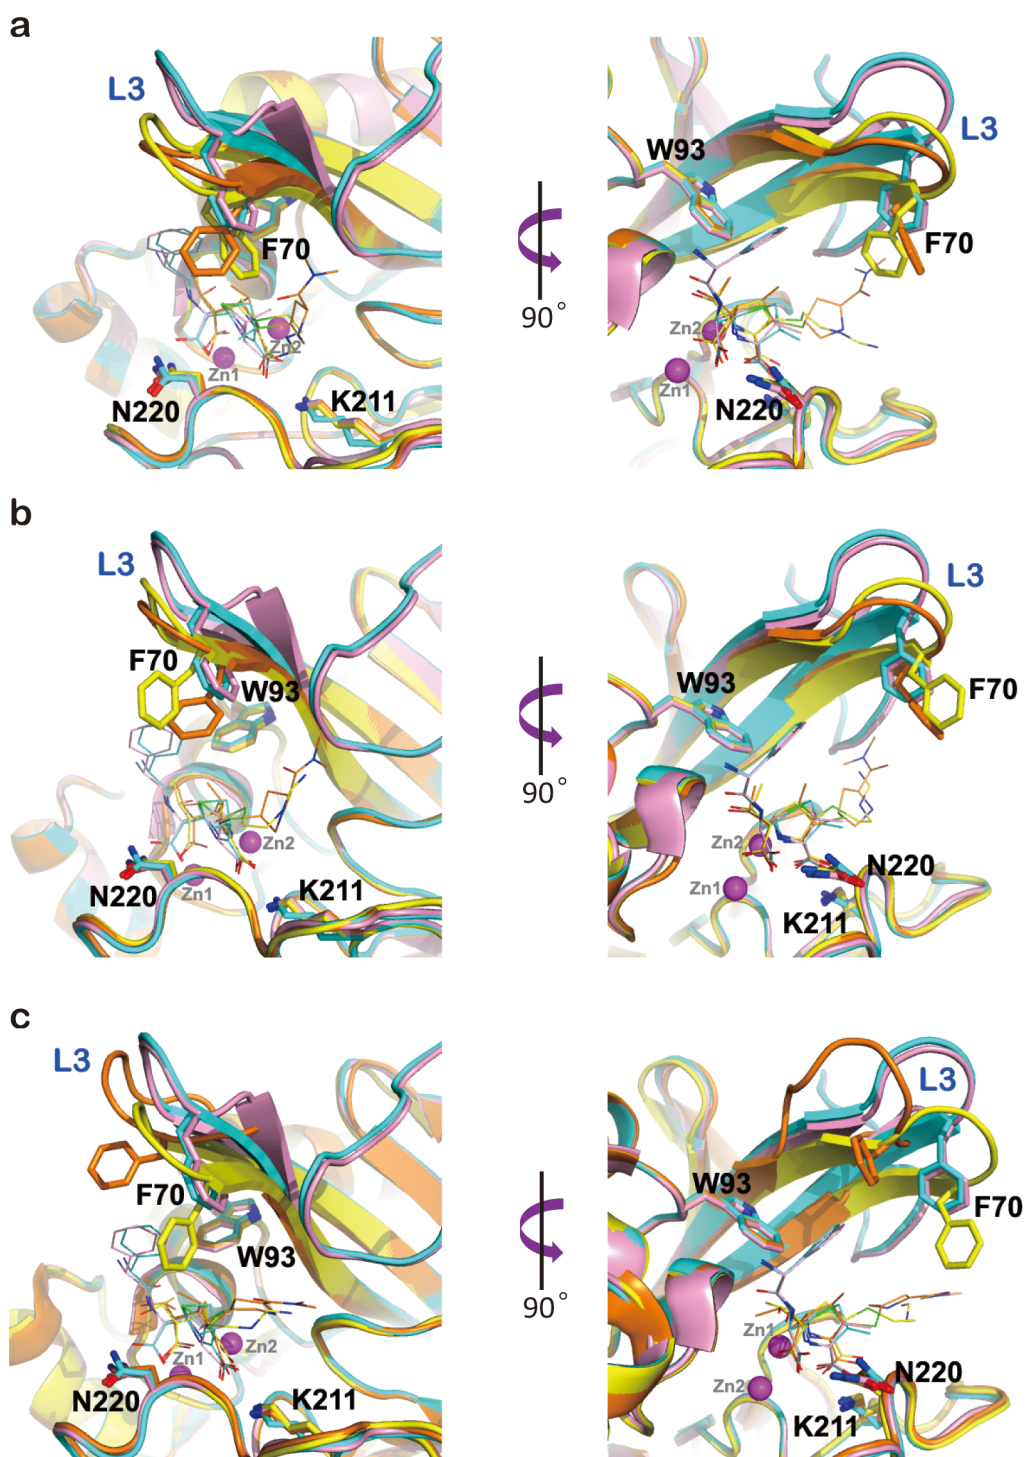

**Supplementary Figure 2** Superimposition of the active site in NDM-1 bound with imipenem, meropenem, ampicillin and cephalexin to compare the orientations and positions of F70, W93, K211 and N220. Imipenem (yellow) and meropenem (orange) bound structures representing the EI<sub>1</sub> (a) or EI<sub>2</sub> (b) intermediates, and the EP complex of NDM-1/imipenem solved in our study (yellow) and the structure of PDB 4EYL<sup>1</sup> (orange) (c) are overlaid with ampicillin (pink) (PDB 3Q6X)<sup>2</sup> and cephalexin (cyan) (PDB 4RL2)<sup>3</sup> bound structures. The hydrolyzed antibiotics are represented in line models and the zinc ions are denoted by magenta spheres.

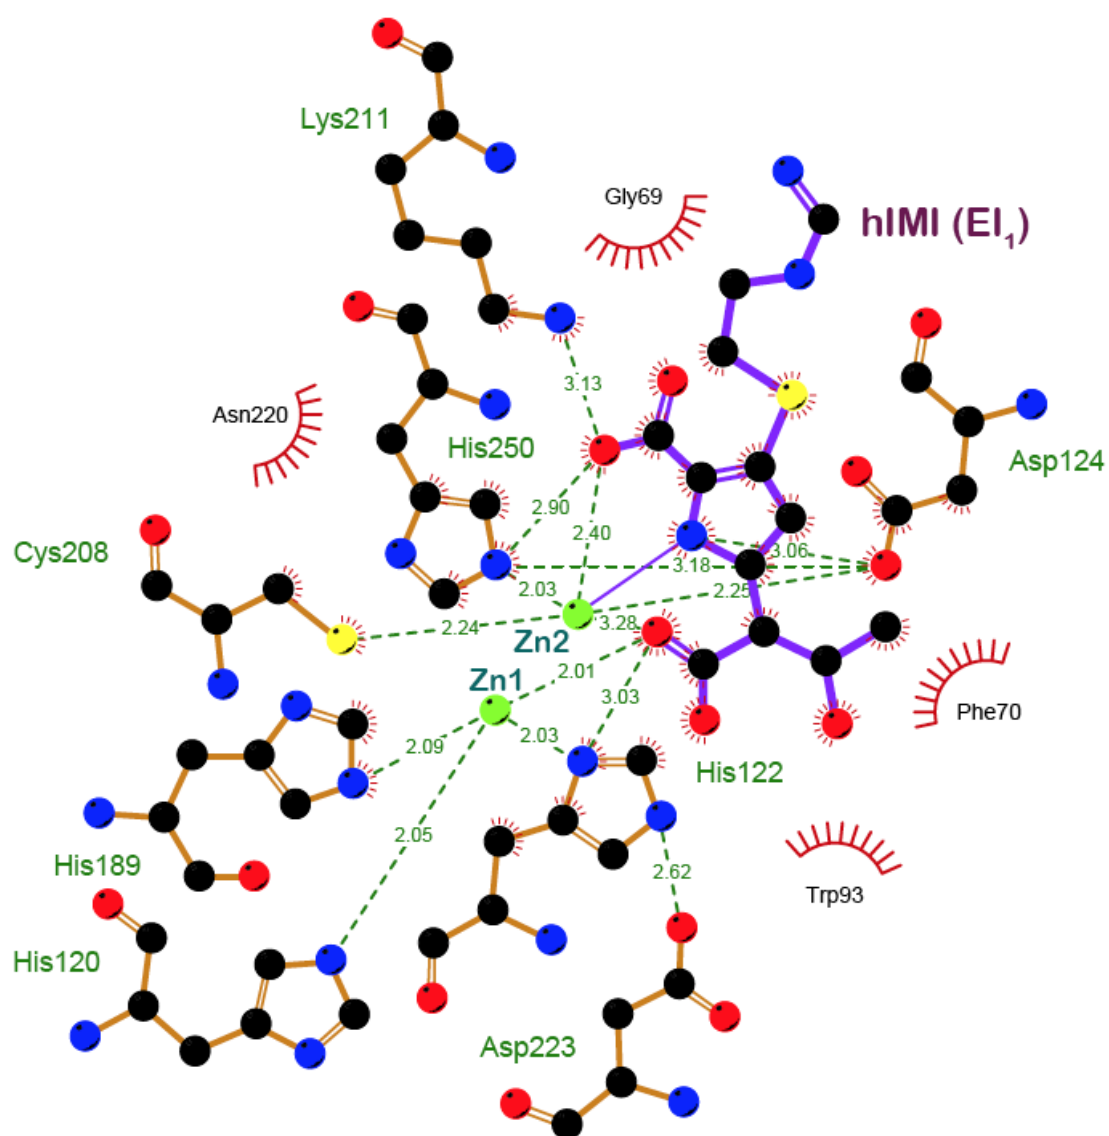

**Supplementary Figure 3.** Ligand-protein and ligand-Zn<sup>2+</sup> interactions around hydrolyzed imipenem that was modeled in the structures representing the EI<sub>1</sub> complex (Fig. 2a) schematically depicted using LigPlot<sup>4</sup>. Hydrogen bonds are shown as dashed lines and the amino acids involved in forming hydrophobic interactions with the bound  $\beta$ -lactam antibiotics are displayed as indented curves. The labeled numbers are the hydrogen bond lengths in Å.

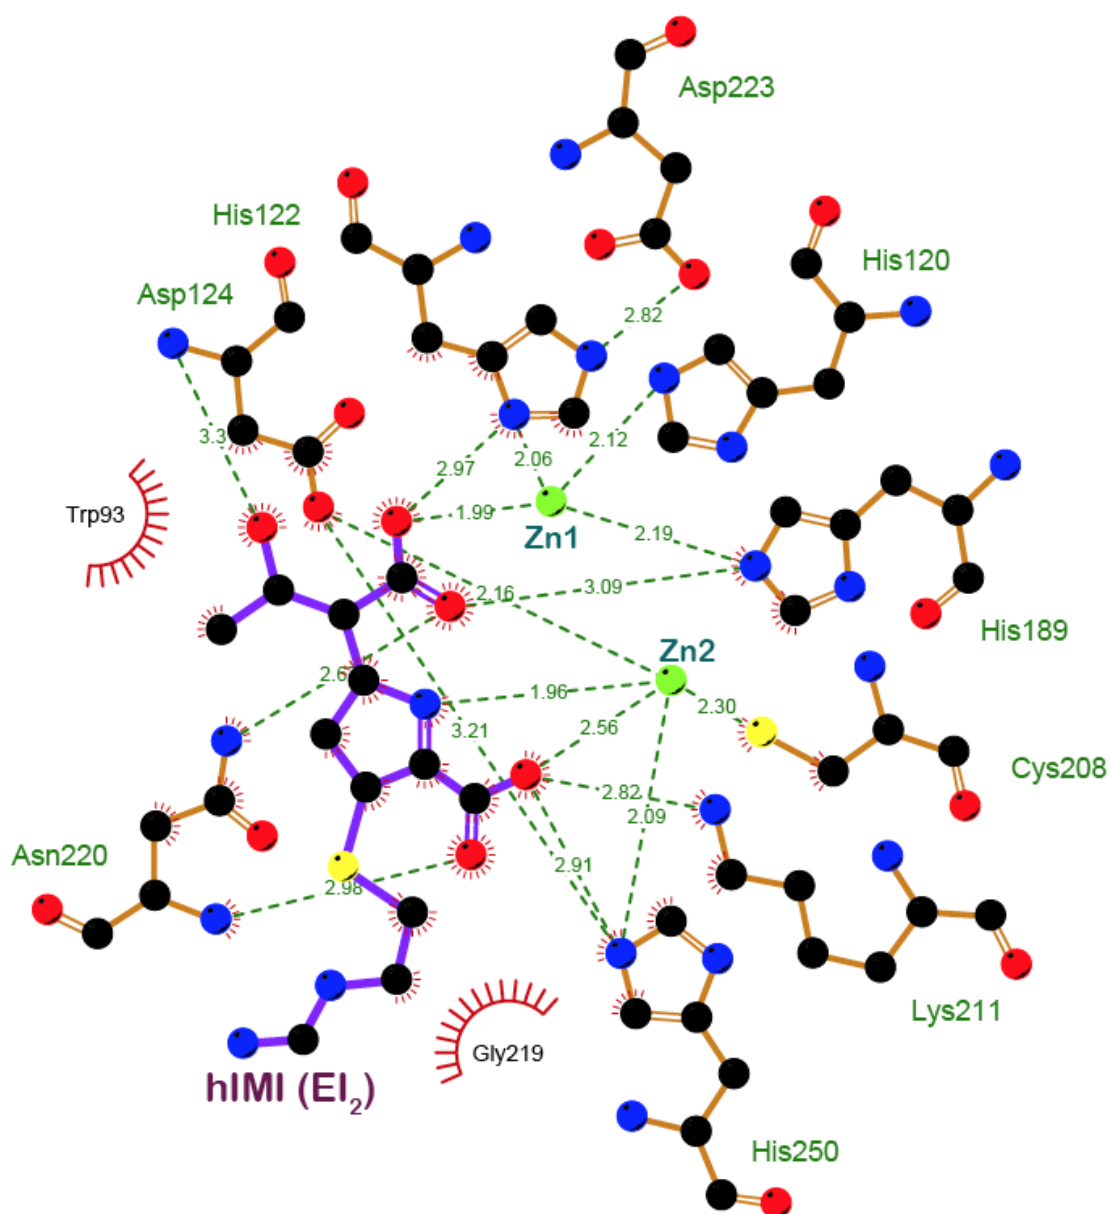

**Supplementary Figure 4.** Ligand-protein and ligand-Zn<sup>2+</sup> interactions around hydrolyzed imipenem that was modeled in the structures representing the EI<sub>2</sub> complex (Fig. 2b and Fig. 3b) schematically depicted using LigPlot<sup>4</sup>. Hydrogen bonds are shown as dashed lines and the amino acids involved in forming hydrophobic interactions with the bound  $\beta$ -lactam antibiotics are displayed as indented curves. The labeled numbers are the hydrogen bond lengths in Å.

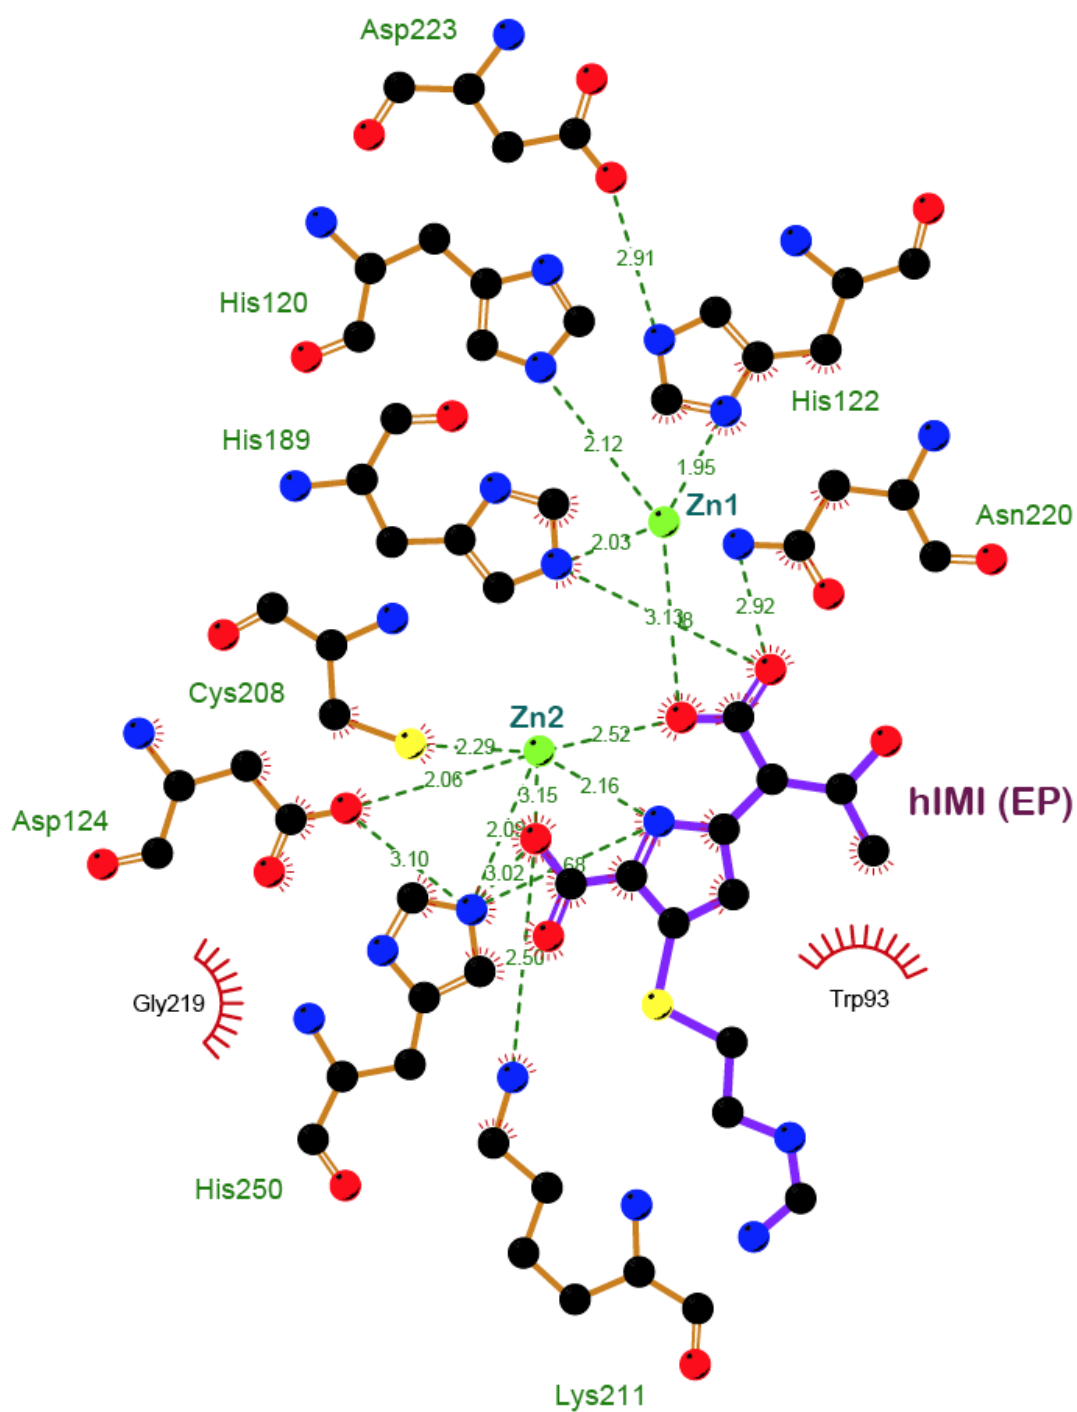

**Supplementary Figure 5.** Ligand-protein and ligand-Zn<sup>2+</sup> interactions around hydrolyzed imipenem that was modeled in the structures representing the EP complex (Fig. 2c and Fig. 3c) schematically depicted using LigPlot<sup>4</sup>. Hydrogen bonds are shown as dashed lines and the amino acids involved in forming hydrophobic interactions with the bound  $\beta$ -lactam antibiotics are displayed as indented curves. The labeled numbers are the hydrogen bond lengths in Å.

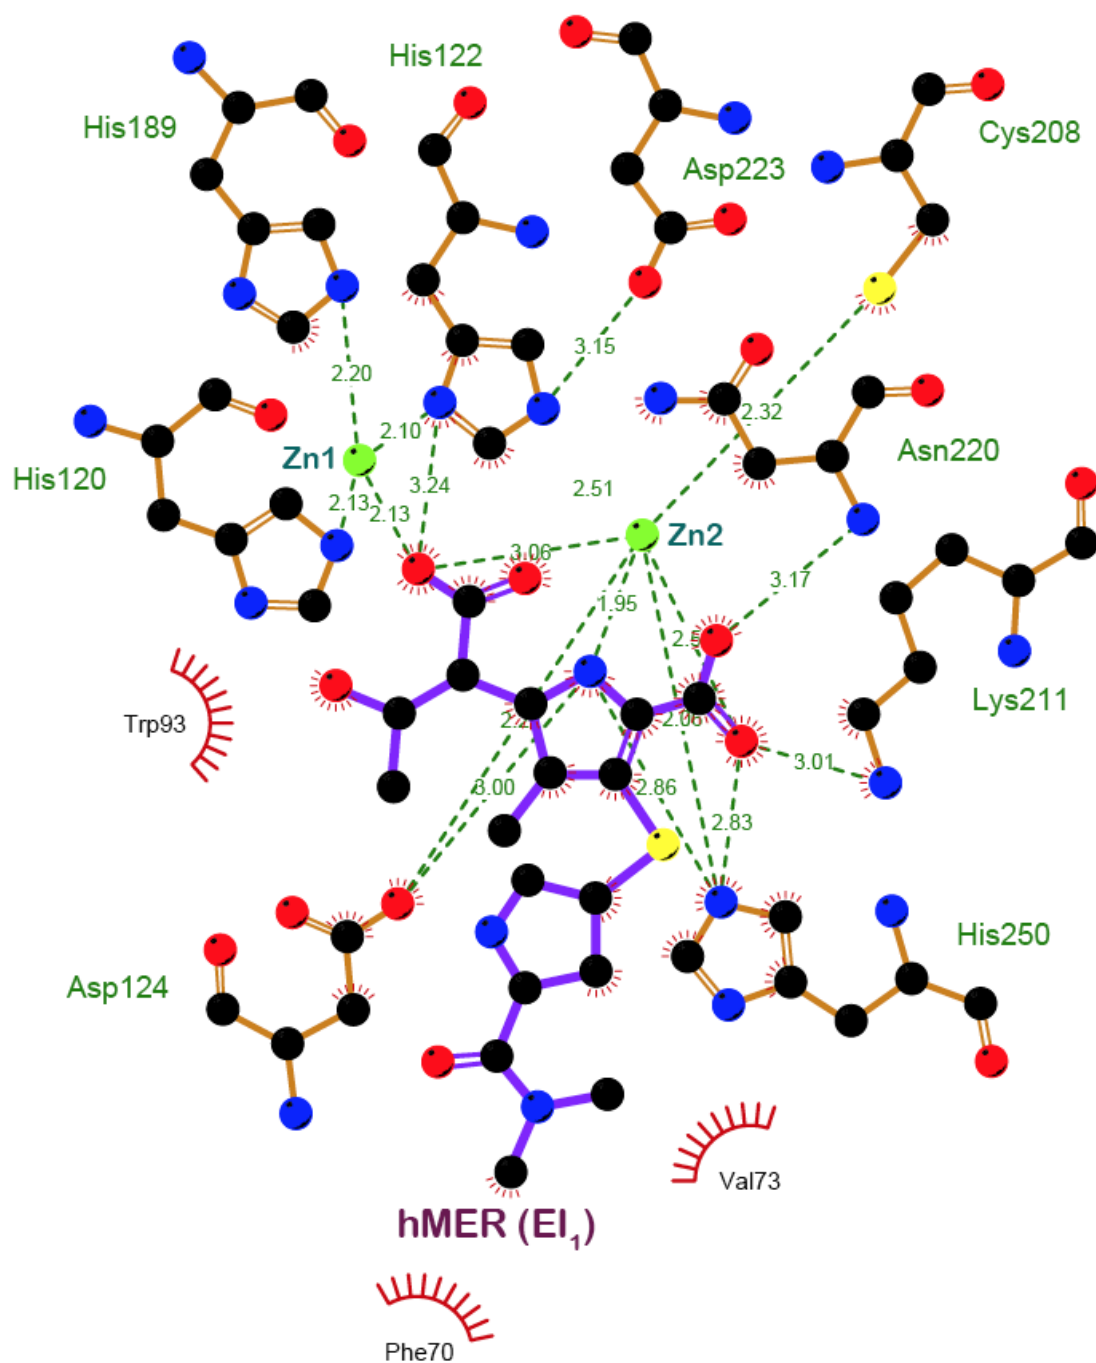

**Supplementary Figure 6.** Ligand-protein and ligand-Zn<sup>2+</sup> interactions around hydrolyzed meropenem that was modeled in the structures representing the EI<sub>1</sub> complex (Fig. 2d and Fig. 3a) schematically depicted using LigPlot<sup>4</sup>. Hydrogen bonds are shown as dashed lines and the amino acids involved in forming hydrophobic interactions with the bound  $\beta$ -lactam antibiotics are displayed as indented curves. The labeled numbers are the hydrogen bond lengths in Å.

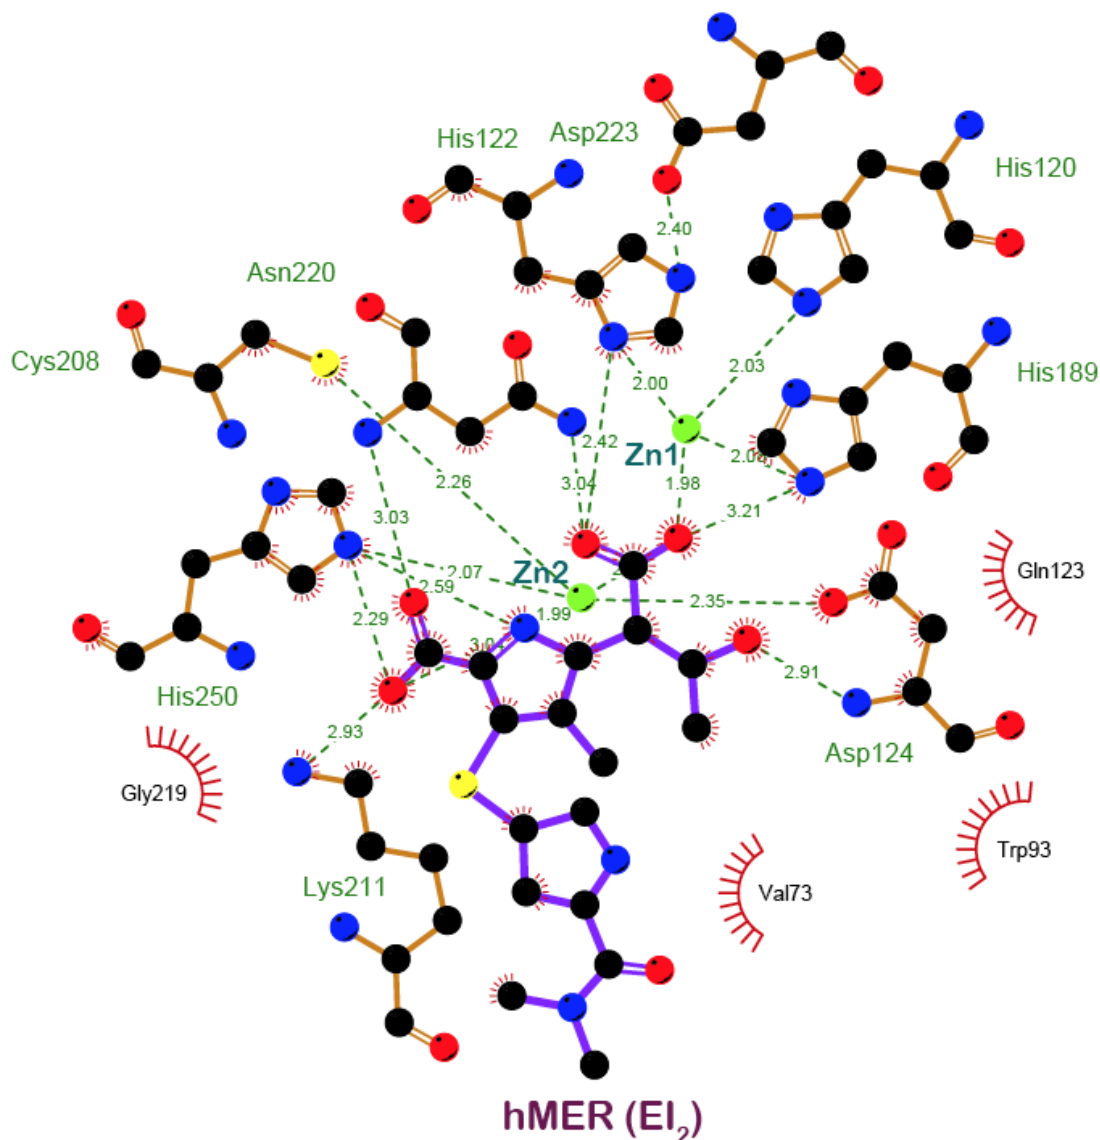

**Supplementary Figure 7.** Ligand-protein and ligand-Zn<sup>2+</sup> interactions around hydrolyzed meropenem that was modeled in the structures representing the EI<sub>2</sub> complex (Fig. 2e) schematically depicted using LigPlot<sup>4</sup>. Hydrogen bonds are shown as dashed lines and the amino acids involved in forming hydrophobic interactions with the bound β-lactam antibiotics are displayed as indented curves. The labeled numbers are the hydrogen bond lengths in Å.

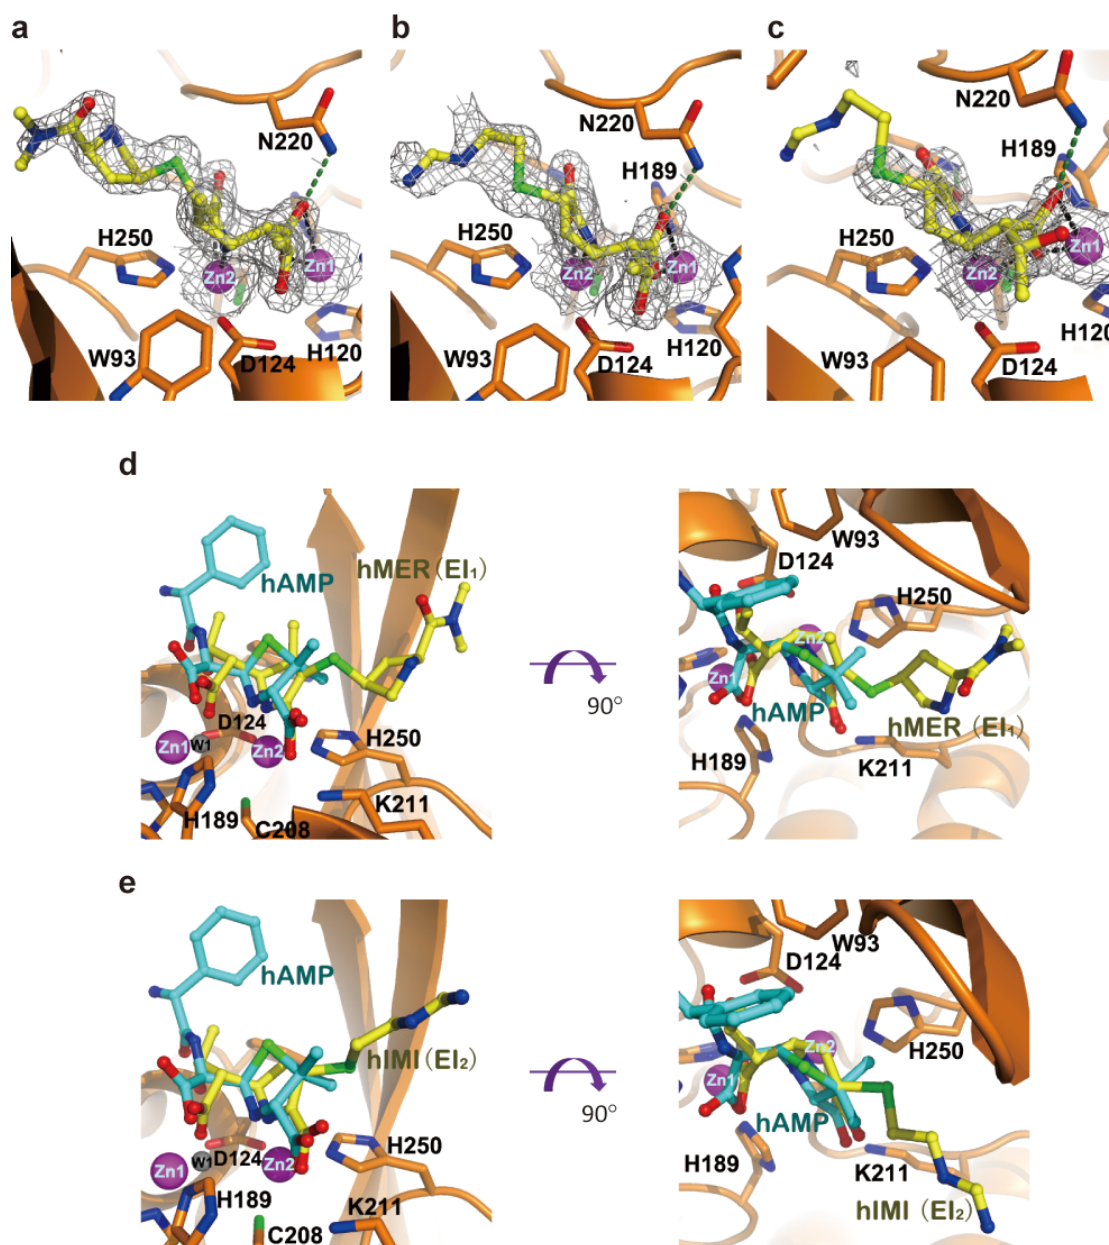

**Supplementary Figure 8.** Close-up views of the active site of NDM-1 representing different enzyme-intermediate/product adducts from a viewing angle different from Figure 3. **(a-c)**, Representation of hydrolytic intermediates of mereopenem (hMER) present in EI<sub>1</sub> **(a)** and imipenem (hIMI) present in EI<sub>2</sub> **(b)** or EP **(c)** viewing from an angle by rotating 180° along the y axis with regard to the same representations shown in panel **a-c** of Figure 3. **(d-e)**, Structure comparison of hydrolyzed ampicillin (hAMP) (PDB 3Q6X)<sup>2</sup> with hMER present in EI<sub>1</sub> **(d)** or hIMI present in EI<sub>2</sub> **(e)**.



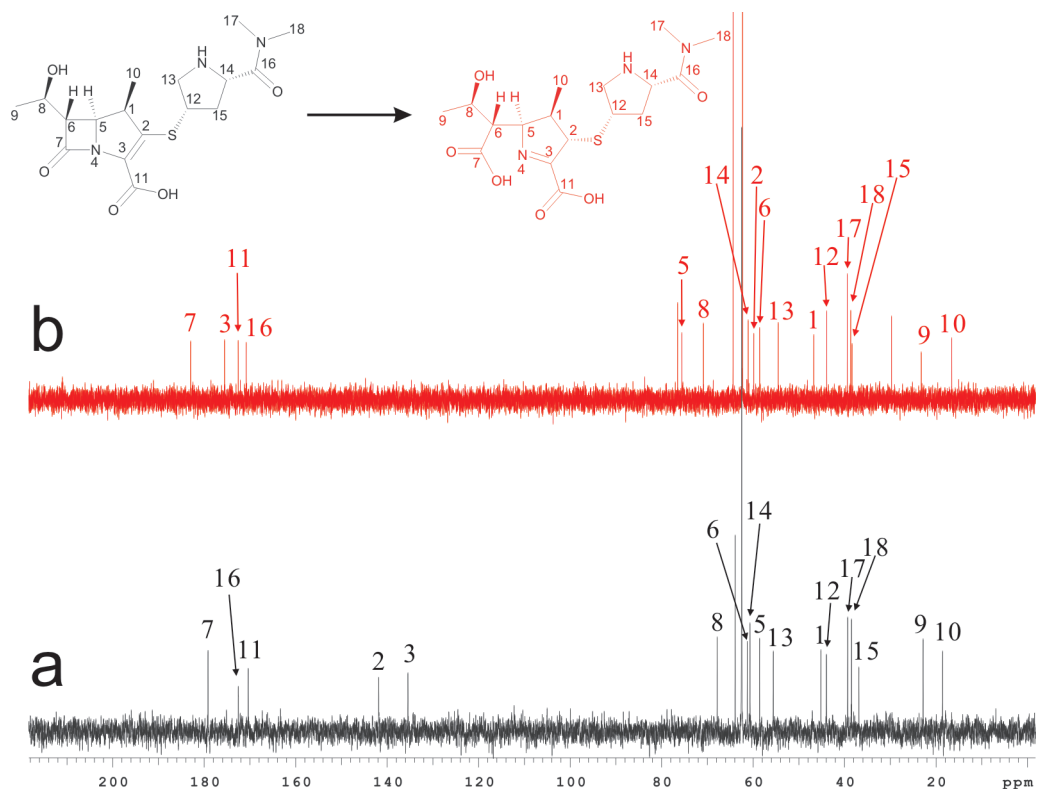

**Supplementary Figure 9.**  $^{13}\text{C}$  NMR spectra of meropenem hydrolysis catalyzed by NDM-1 in Tris-HCl buffer. The spectra recorded for the intact substrate (**a**) and the final hydrolyzed product (**b**) are shown in parallel to compare the chemical shifts before and after the hydrolysis. The chemical structures of the substrate and the product are displayed on upper-left in black and red respectively.

**Supplementary Table 1.** Synthesized nucleotide sequence encoding NDM-1 and primer sequences used in PCR amplification

|                                        |                                                                                                                                                                                                                                                                                                                                                                                                                                                                                                                                                                                                                                                                                                                                                                                                                                                                                                                        |
|----------------------------------------|------------------------------------------------------------------------------------------------------------------------------------------------------------------------------------------------------------------------------------------------------------------------------------------------------------------------------------------------------------------------------------------------------------------------------------------------------------------------------------------------------------------------------------------------------------------------------------------------------------------------------------------------------------------------------------------------------------------------------------------------------------------------------------------------------------------------------------------------------------------------------------------------------------------------|
| <b>Synthesized nucleotide sequence</b> | 5'-ATGGAATTGCCCAATATTATGCACCCGGTCGCGAAGCTGAGCACCG<br>CATTAGCCGCTGCATTGATGCTGAGCGGGTGCATGCCCGGTGAAATCC<br>GCCCCGACGATTGGCCAGCAAATGGAAACTGGCGACCAACGGTTTGGCG<br>ATCTGGTTTTCCGCCAGCTCGCACCGAATGTCTGGCAGCACACTTCCT<br>ATCTCGACATGCCGGGTTTCGGGGCAGTCGCTTCCAACGGTTTGATCG<br>TCAGGGATGGCGGCCGCGTGCTGGTGGTCGATACCGCCTGGACCGATG<br>ACCAGACCGCCCAGATCCTCAACTGGATCAAGCAGGAGATCAACCTGC<br>CGGTCGCGCTGGCGGTGGTGA CTACGCGCATCAGGACAAGATGGGCG<br>GTATGGACGCGCTGCATGCGGCGGGGATTGCGACTTATGCCAATGCGT<br>TGTCGAACCAGCTTGCCCCGCAAGAGGGGATGGTTGCGGCGCAACACA<br>GCCTGACTTTCGCCGCCAATGGCTGGGTGCAACCAGCAACCGCGCCCA<br>ACTTTGGCCCGCTCAAGGTATTTTACCCCGGCCCGCCACACCAGTG<br>ACAATATCACCGTTGGGATCGACGGCACCGACATCGCTTTTGGTGGCT<br>GCCTGATCAAGGACAGCAAGGCCAAGTCGCTCGGCAATCTCGGTGATG<br>CCGACACTGAGCACTACGCCGCGTCAGCGCGCGCGTTTGGTGCGGCGT<br>TCCCCAAGGCCAGCATGATCGTGATGAGCCATTCCGCCCCGATAGCC<br>GCGCCGCAATCACTCATA CGGCCCGCATGGCCGACAAGCTGCGCTGA-<br>3' |
| <b>Forward primer<sup>1</sup></b>      | 5' -ATATTA <u>ACATATGGGT</u> GAAATCCGCCG-3'                                                                                                                                                                                                                                                                                                                                                                                                                                                                                                                                                                                                                                                                                                                                                                                                                                                                            |
| <b>Reverse primer<sup>2</sup></b>      | 5' - TTACT <u>CGAGT</u> CAGCGCAGCTTGTGGCC-3'                                                                                                                                                                                                                                                                                                                                                                                                                                                                                                                                                                                                                                                                                                                                                                                                                                                                           |

<sup>1</sup> Underlined is the *NdeI* restriction site.

<sup>2</sup> Underlined is the *XhoI* restriction site.

**Supplementary Table 2.** Chemical shifts of meropenem before and after hydrolysis in  $^1\text{H}$  and  $^{13}\text{C}$  spectra

| Atom index | Meropenem          |        |        |                       | Hydrolyzed meropenem |        |        |                       |
|------------|--------------------|--------|--------|-----------------------|----------------------|--------|--------|-----------------------|
|            | $^1\text{H}$ (ppm) | Integ. | Multi. | $^{13}\text{C}$ (ppm) | $^1\text{H}$ (ppm)   | Integ. | Multi. | $^{13}\text{C}$ (ppm) |
| 1          | 3.35               | 1      | m      | 45.14                 | 2.51                 | N/A    | m      | 46.43                 |
| 2          | NA                 | N/A    | N/A    | 140.67                | 3.87                 | N/A    | s      | 59.74                 |
| 3          | NA                 | N/A    | N/A    | 136.09                | NA                   | N/A    | N/A    | 176.17                |
| 5          | 4.20               | ov     | ov     | 58.61                 | 4.31                 | N/A    | dd     | 75.01                 |
| 6          | 3.42               | ov     | ov     | 61.43                 | 2.62                 | N/A    | dd     | 57.89                 |
| 7          | NA                 | N/A    | N/A    | 179.25                | NA                   | N/A    | N/A    | 182.22                |
| 8          | 4.21               | ov     | ov     | 67.84                 | 4.00                 | N/A    | dt     | 70.44                 |
| 9          | 1.25               | 3      | d      | 22.85                 | 1.22                 | N/A    | d      | 22.92                 |
| 10         | 1.17               | 3      | d      | 18.57                 | 1.03                 | N/A    | d      | 16.32                 |
| 11         | NA                 | N/A    | N/A    | 170.30                | NA                   | N/A    | N/A    | 171.99                |
| 12         | 4.01               | 1      | m      | 43.14                 | 3.76                 | N/A    | ov     | 43.92                 |
| 13         | 3.73, 3.42         | 1, ov  | dd, ov | 55.03                 | 3.77, 3.39           | N/A    | ov, dd | 54.39                 |
| 14         | Water signal*      | N/A    | N/A    | 60.89                 | Water signal*        | N/A    | N/A    | 60.98                 |
| 15         | 3.14, 1.92         | ov, 1  | ov, m  | 36.36                 | 2.98, 1.89           | N/A    | ov, m  | 38.31                 |
| 16         | NA                 | N/A    | N/A    | 170.74                | NA                   | N/A    | N/A    | 170.70                |
| 17, 18     | 3.02, 2.96         | 3, 3   | s, s   | 39.32, 38.56          | 3.02, 2.95           | N/A    | s, s   | 39.35, 38.61          |

\* Proton signal merged with water signal.

### Supplementary References:

- 1 King, D. T., Worrall, L. J., Gruninger, R. & Strynadka, N. C. New Delhi metallo-beta-lactamase: structural insights into beta-lactam recognition and inhibition. *J Am Chem Soc* **134**, 11362-11365 (2012).
- 2 Zhang, H. & Hao, Q. Crystal structure of NDM-1 reveals a common beta-lactam hydrolysis mechanism. *FASEB J* **25**, 2574-2582 (2011).
- 3 Feng, H. *et al.* Structural and mechanistic insights into NDM-1 catalyzed hydrolysis of cephalosporins. *J Am Chem Soc* **136**, 14694-14697 (2014).
- 4 Laskowski, R. A. & Swindells, M. B. LigPlot+: multiple ligand-protein interaction diagrams for drug discovery. *J Chem Inf Model* **51**, 2778-2786 (2011).
